# Supplementary material for: Single-cell RNA sequencing reveals the expansion of circulating tissue-homing B cell subsets in secondary acute dengue viral infection
Source: PubMed Central journal article supplement — Heliyon. 2024 Apr 26;10(10):e30314. doi: 10.1016/j.heliyon.2024.e30314 (PMC11137366; doi:10.1016/j.heliyon.2024.e30314), 2024-04-26
Supplement: mmc1.pdf [file mmc1.pdf]

**Table S1.** Established canonical marker genes for the identification of B cell subpopulations. Related to Figures 1, 3 and 4.

| <b>B cell subsets</b> | <b>Positive marker genes</b>             | <b>Negative marker genes</b> |
|-----------------------|------------------------------------------|------------------------------|
| Naive B cells         | <i>MS4A1, IGHD</i>                       |                              |
| Memory B cells        | <i>MS4A1</i>                             | <i>IGHD</i>                  |
| Plasma cells          | <i>CD79A, IGHG1, IGKC, JCHAIN</i>        | <i>MKI67</i>                 |
| Plasmablasts          | <i>CD79A, IGHG1, IGKC, JCHAIN, MKI67</i> |                              |

**Table S2.** Characteristics of DENV-infected patients used in the flow cytometry experiments.

| Sample | Clinical diagnosis | Types of infection | Serotypes | Viral load | Age | Gender |
|--------|--------------------|--------------------|-----------|------------|-----|--------|
| 1      | DF                 | Secondary          | DENV-3    | 1.21E+07   | 18  | Male   |
| 2      | DF                 | Secondary          | DENV-4    | 7.93E+08   | 23  | Male   |
| 3      | DF                 | Secondary          | DENV-3    | 2.74E+06   | 19  | Male   |
| 4      | DF                 | Secondary          | DENV-2    | 9.21E+03   | 17  | Male   |
| 5      | DF                 | Secondary          | DENV-2    | 2.66E+08   | 30  | Male   |
| 6      | DF                 | Secondary          | DENV-3    | 6.40E+09   | 17  | Male   |
| 7      | DF                 | Secondary          | DENV-3    | 6.21E+09   | 16  | Female |
| 8      | DF                 | Secondary          | DENV-4    | 1.77E+06   | 37  | Male   |
| 9      | DHF                | Secondary          | DENV-3    | 5.45E+06   | 20  | Male   |
| 10     | DHF                | Secondary          | DENV-2    | 3.96E+07   | 15  | Male   |
| 11     | DHF                | Secondary          | DENV-2    | 2.00E+04   | 49  | Female |
| 12     | DHF                | Secondary          | DENV-3    | 2.71E+07   | 27  | Female |
| 13     | DHF                | Secondary          | DENV-2    | 3.82E+09   | 19  | Male   |
| 14     | DHF                | Secondary          | DENV-4    | 1.24E+05   | 19  | Female |
| 15     | DHF                | Secondary          | DENV-3    | 4.16E+10   | 21  | Female |
| 16     | DHF                | Secondary          | DENV-2    | 1.26E+03   | 20  | Female |

DF = dengue fever; DHF = dengue hemorrhagic fever. DENV = dengue virus

**Table S2.** Characteristics of DENV-infected patients used in the flow cytometry experiments (Cont.).

| Sample | Clinical diagnosis | Types of infection | Serotypes | Viral load | Age | Gender |
|--------|--------------------|--------------------|-----------|------------|-----|--------|
| 17     | Healthy            | -                  | -         | Negative   | 50  | Male   |
| 18     | Healthy            | -                  | -         | Negative   | 27  | Female |
| 19     | Healthy            | -                  | -         | Negative   | 25  | Female |
| 20     | Healthy            | -                  | -         | Negative   | 50  | Female |
| 21     | Healthy            | -                  | -         | Negative   | 55  | Female |
| 22     | Healthy            | -                  | -         | Negative   | 36  | Female |
| 23     | Healthy            | -                  | -         | Negative   | 28  | Male   |
| 24     | Healthy            | -                  | -         | Negative   | 53  | Female |
| 25     | Healthy            | -                  | -         | Negative   | 51  | Male   |
| 26     | Healthy            | -                  | -         | Negative   | NA  | Female |

Healthy controls were recruited from uninfected household family members of the index cases, who established no dengue-related clinical symptoms and tested negative for dengue viral genome by nested RT-PCR for three consecutive days. The detailed description for the recruitment of healthy controls can be found in our previous publication [19].

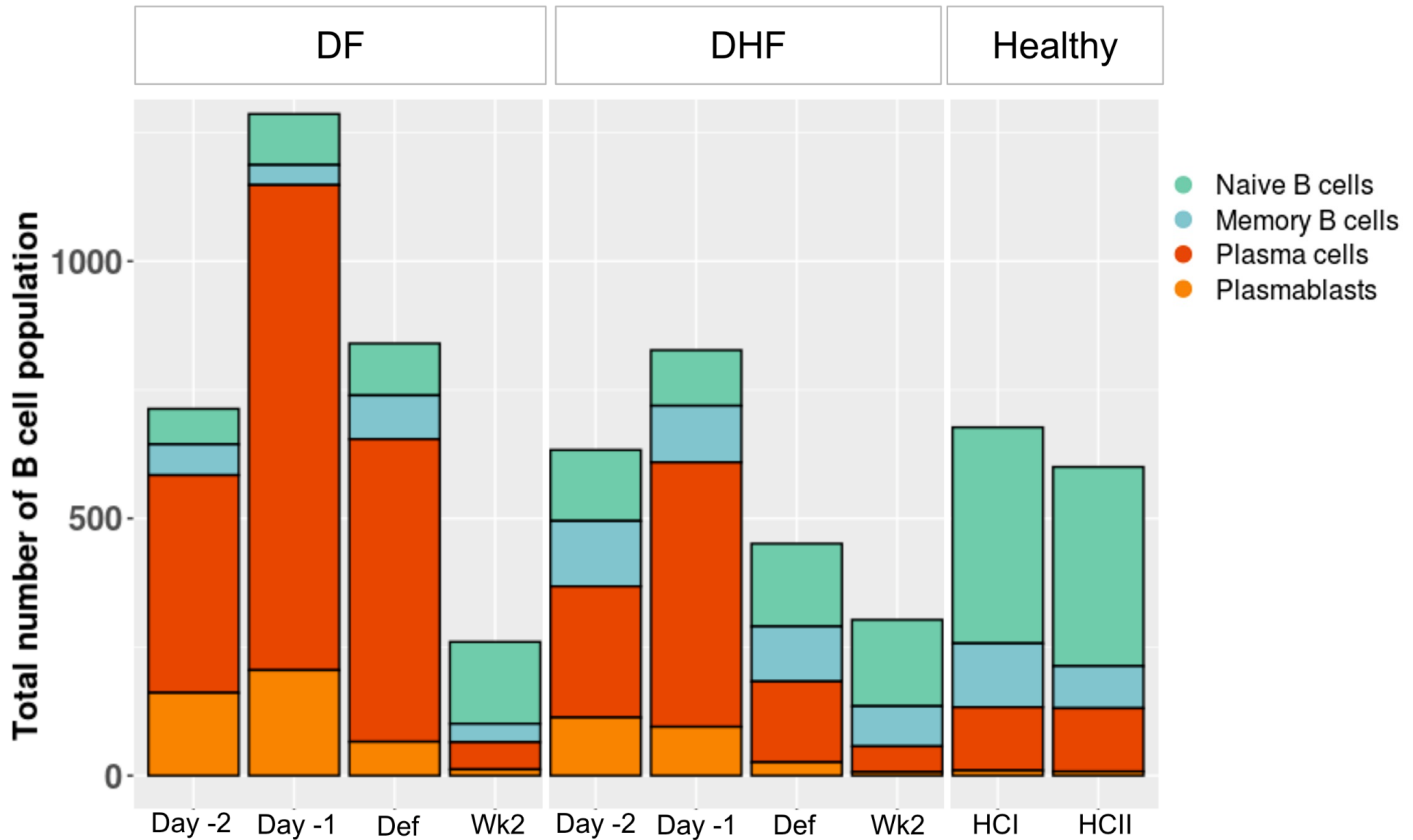

**Fig. S1.** Abundances of B cell subpopulations in each donor during the acute (Day -2, Day -1, and Def), and late convalescent (Wk2, two-week after defevescence) phases. Def = defevescence, Day -2 = two days before Def, Day -1 = one day before Def, HC = healthy control, DF = dengue fever and DHF = dengue hemorrhagic fever.

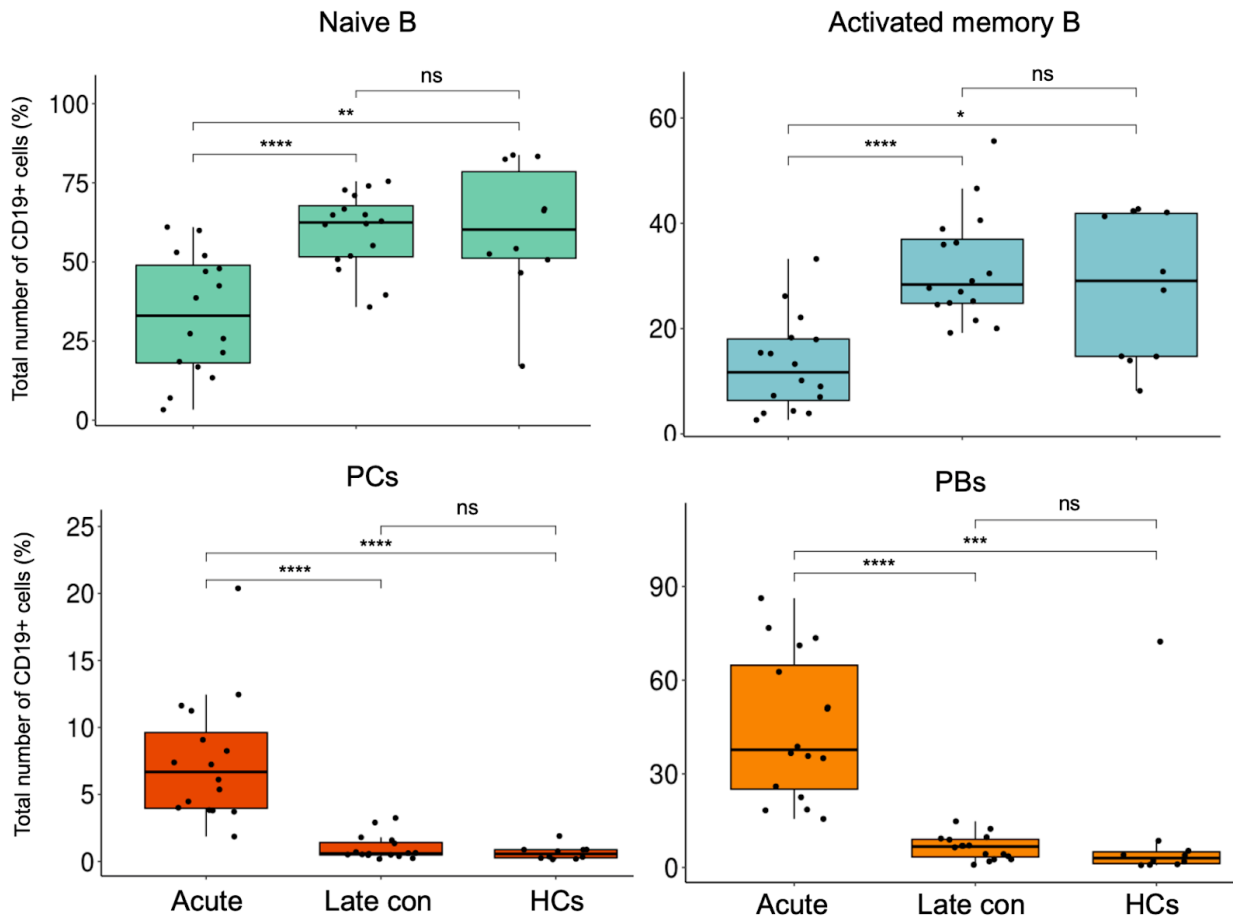

**Fig. S2.** A comparison of percentages in each B cell subpopulation between DENV-infected patients during acute (at Day -1) and late convalescent (at Wk2), as well as healthy controls. The statistical significance was assessed using Kruskal-Wallis test followed by Dunn's test with a Bonferroni correction method. ns =  $p > 0.05$ , \* $p \leq 0.05$ , \*\* $p \leq 0.01$ , \*\*\* $p \leq 0.001$ , and \*\*\*\* $p \leq 0.0001$ . Patient donors,  $n = 16$  and healthy donors,  $n = 10$ . HC = healthy control, PCs = plasma cell, PBs = plasmablasts, Late con = late convalescent phase.

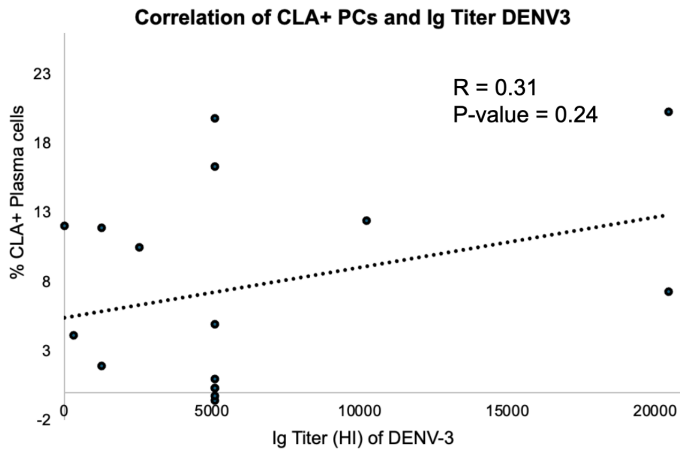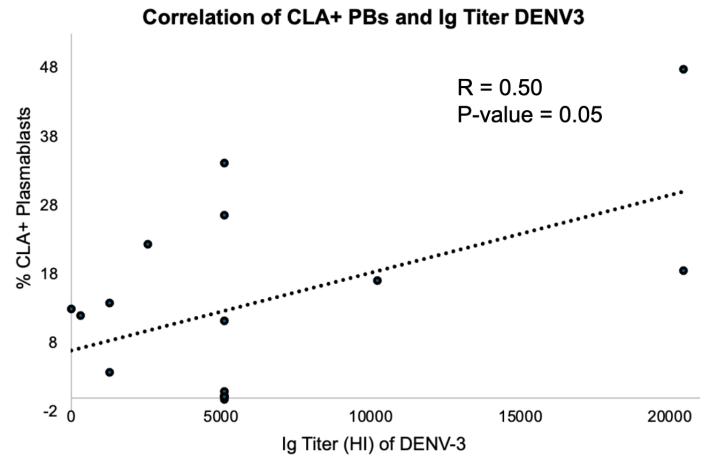

**Fig. S3.** Correlation of the percentages of CLA+ PCs (left panel) and PBs (right panel) with the Ig titer of anti-DENV 3 across DF and DHF patients. R represents the Pearson correlation coefficient. PCs refer to plasma cells and PBs refer to plasmablasts.

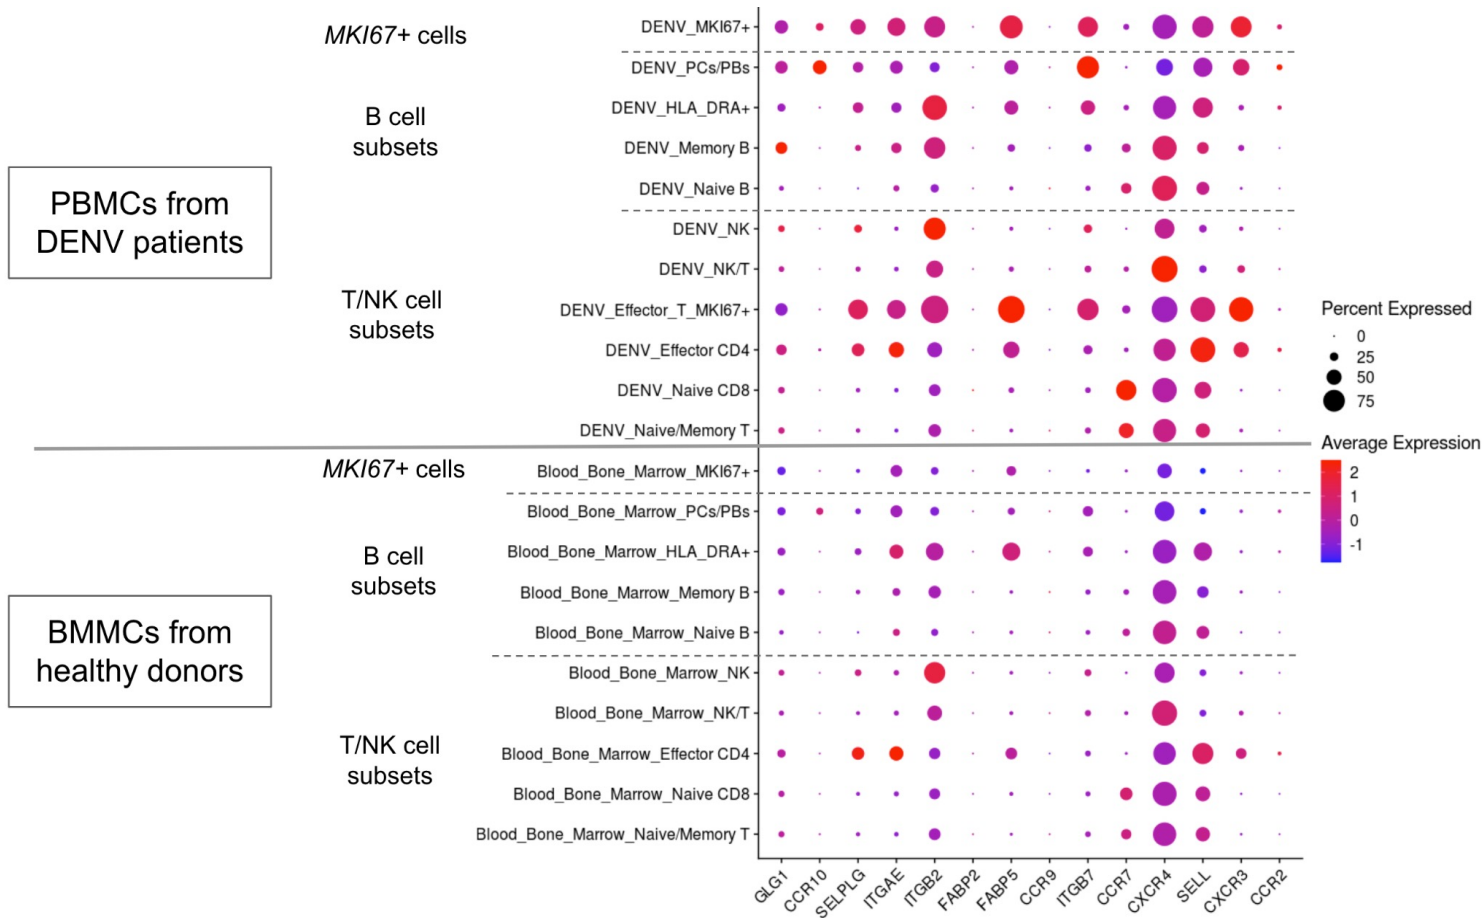

**Fig. S4.** Dotplot representing the average expression levels of tissue-homing genes on *MKI67+*, B, T, and NK cell subsets in blood samples of DENV-infected patients (upper panel) and bone marrow dataset from healthy donors (lower panel). Color intensity represents relative expression values and dot size represents fraction of cells within the subsets expressing a given gene. PCs = plasma cells, PBs = plasmablasts, and BMMCs = bone marrow mononuclear cells.
